# Supplementary material
Source: publisher site journal article supplement (https://www.spandidos-publications.com/8144/downloadSupplementary)

Figure S2. Correlation of POSTN and FAP with macrophage markers and characterization of POSTN<sup>+</sup> fibroblast subtypes in HNSCC. (A) Expression levels of POSTN and FAP showed a positively correlation with the M1 macrophage marker CD86 ( $P=9.4 \times 10^{-13}$ ;  $P<2.2 \times 10^{-16}$ ). (B) Expression levels of POSTN and FAP showed a positively correlation with the M2 macrophage marker CD206 ( $P<2.2 \times 10^{-16}$ ;  $P<2.2 \times 10^{-16}$ ). (C) HNSCC-TCGA was identified into two molecular subtypes. (D) t-SNE plots showed the discrimination between the POSTN<sup>-</sup>/POSTN<sup>+</sup> fibroblasts. (E) The distribution of StromalScore ( $P<2.2 \times 10^{-16}$ ), ESTIMATEScore ( $P<2.2 \times 10^{-16}$ ), ImmuneScore ( $P=0.21$ ), POSTN\_Score ( $P<2.2 \times 10^{-16}$ ) and TumorPurity ( $P<2.2 \times 10^{-16}$ ) between POSTN<sup>-</sup>/POSTN<sup>+</sup> fibroblasts. Statistical significance was determined by unpaired two-tailed Student's t-test. Error bars represent the mean  $\pm$  SEM. POSTN, perostin; FAP, fibroblast activation protein; HNSCC, head and neck squamous cell carcinoma; t-SNE, t-distributed stochastic neighbor embedding.

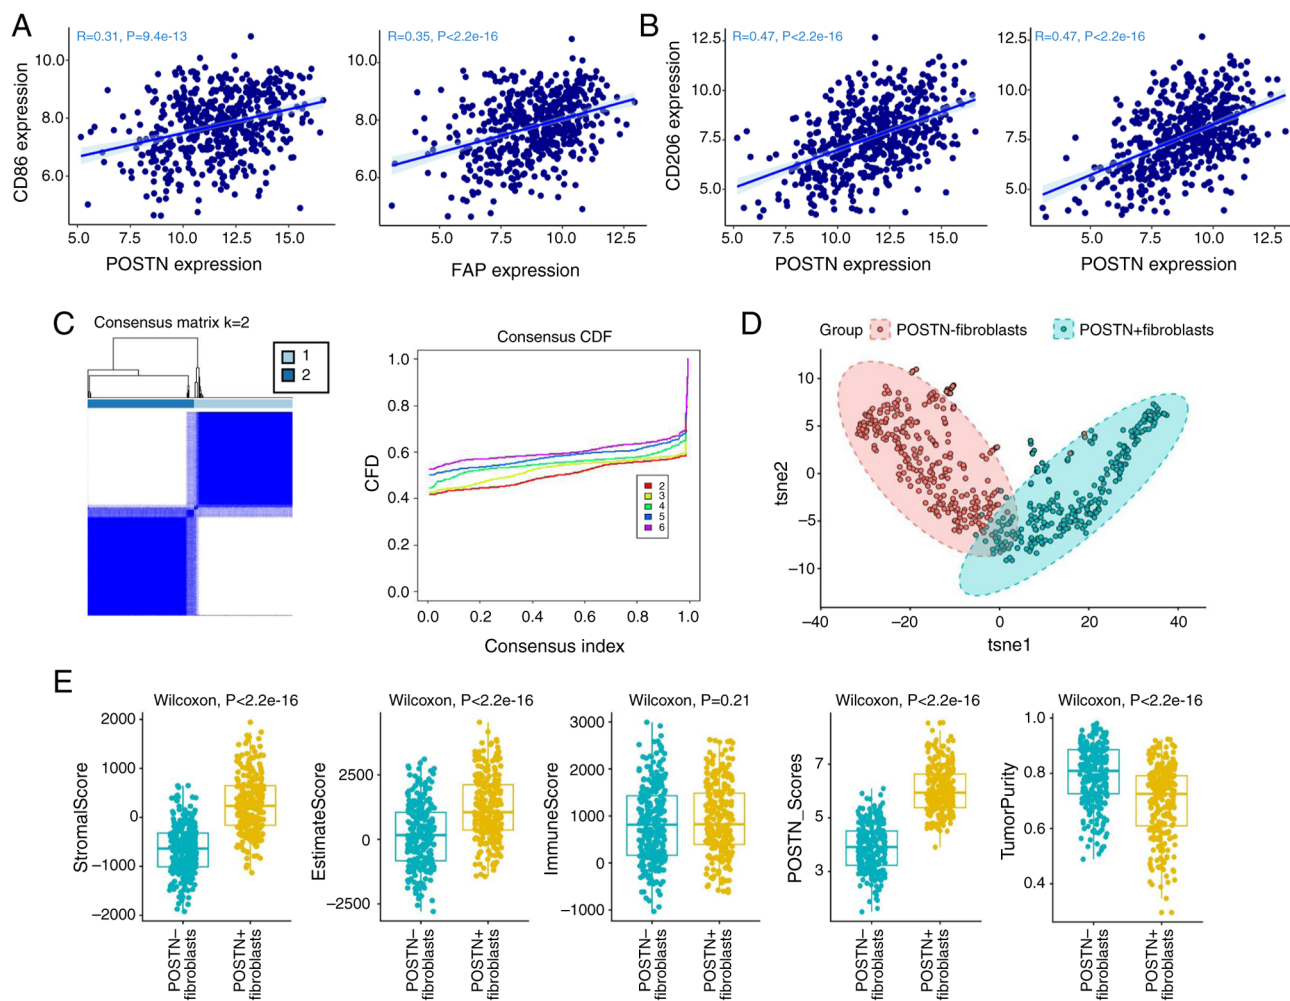

Figure S3. sEV POSTN-blocking antibody modulates M2 macrophage polarization. (A-D) The mRNA expression of CD163 and CD206 expression in macrophages were incubated with CAF-S5/-S6 sEV-blocking POSTN antibody were analyzed by (A) RT-qPCR, (B) western blotting and (C and D) flow cytometry. Each experiment was replicated three times. Statistical significance was determined by Unpaired two-tailed Student's t-test, \* $P < 0.05$ ; \*\* $P < 0.01$ ; \*\*\* $P < 0.001$ . Error bars represent the mean  $\pm$  SEM. For source data for blotting assays, see Fig. S5. sEV, small extracellular vesicles; POSTN, perostin; RT-qPCR, reverse transcription-quantitative PCR.

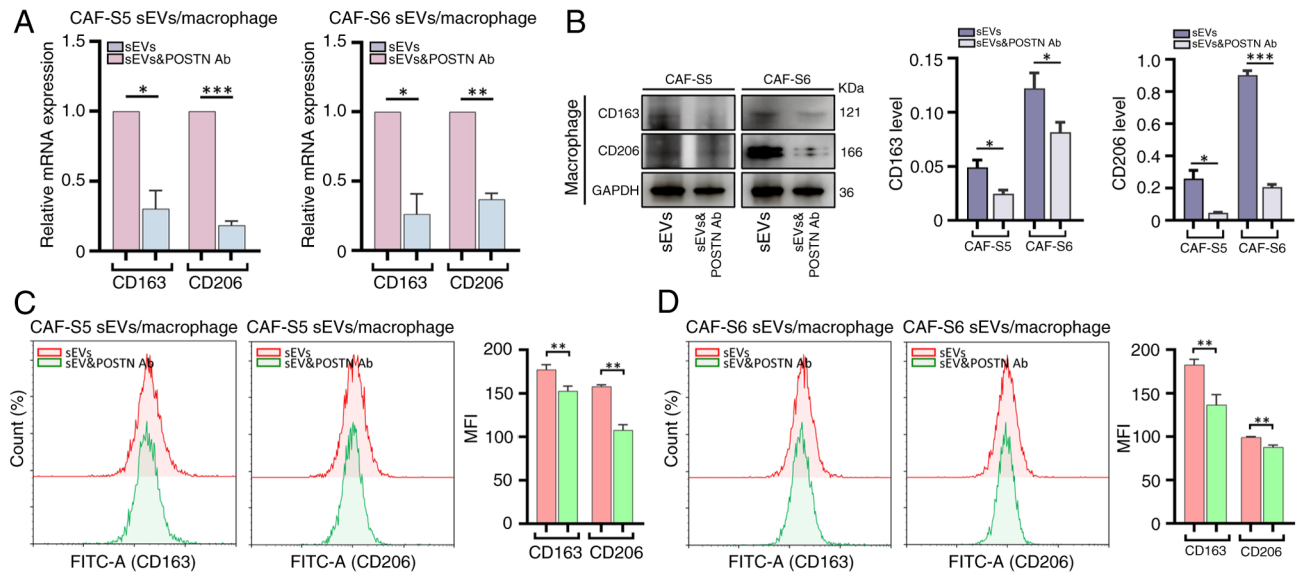

Figure S4. BMP4 levels in in sEV-derived CAF-S5/-S6. BMP4 levels in sEV-derived CAF-S5/-S6 transfected with shNC and shPOSTN were analyzed by ELISA. Statistical significance was determined by unpaired two-tailed Student's t-test, \*P<0.05. Error bars represent the mean  $\pm$  SEM. sEV, small extracellular vesicles; POSTN, perostin; sh, short hairpin; NC, negative control.

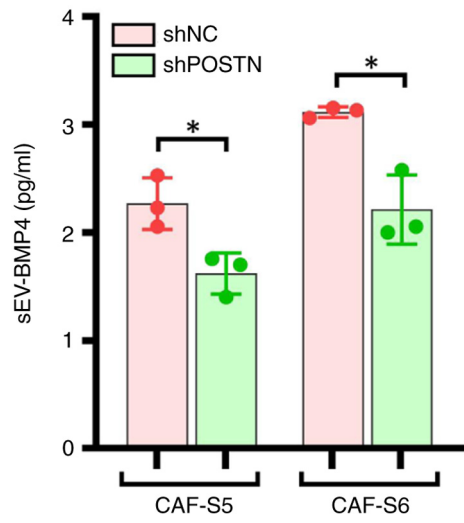

Figure S5. Original data for the blots.

Figure 3C

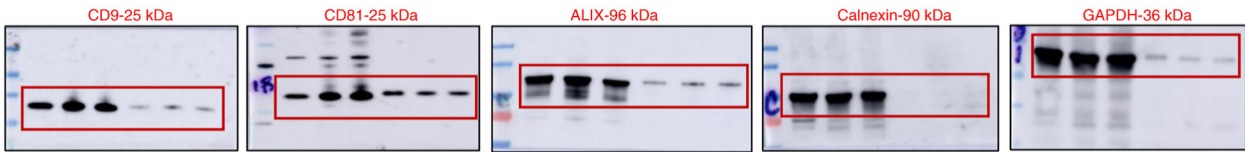

Figure 3F

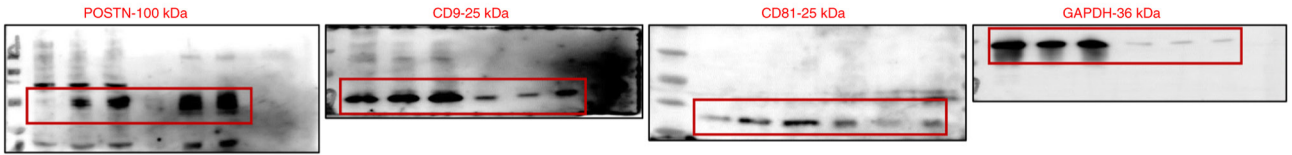

Figure 3F

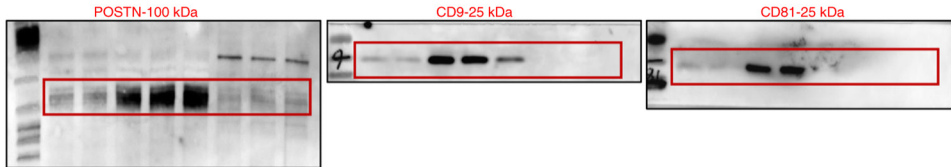

Figure 4A

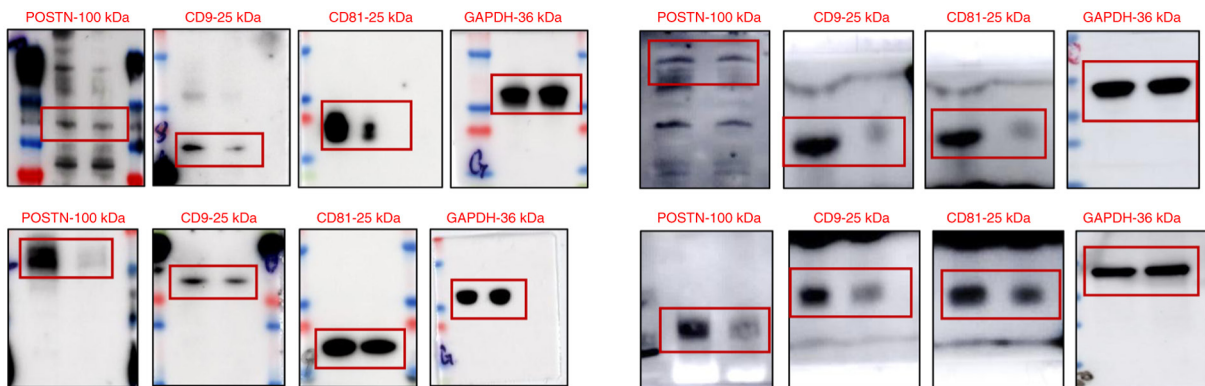

Figure 4H

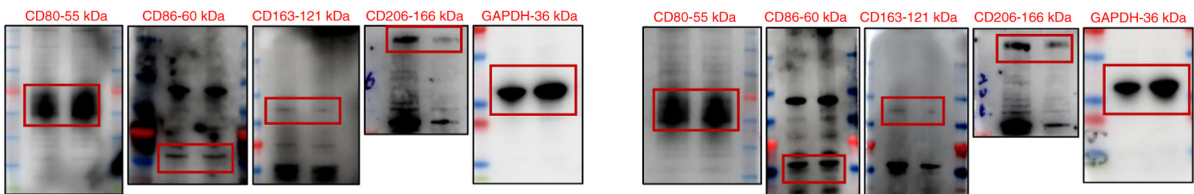

Figure 5K

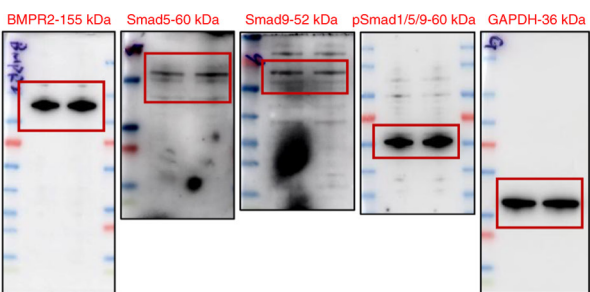

Figure 5L

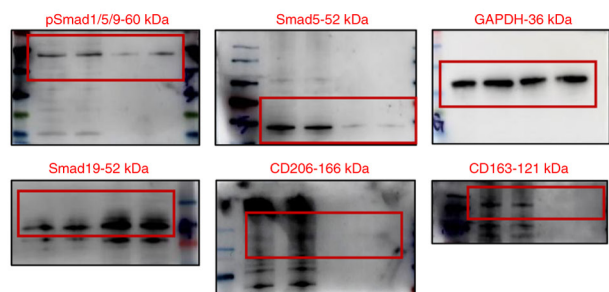

Figure S3B

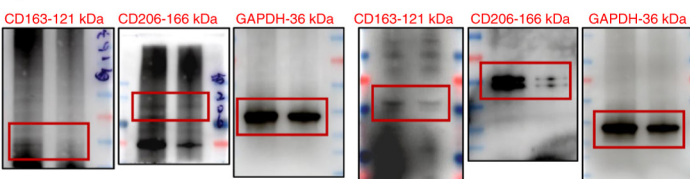

Supplement: Supplementary file 1 [file downloadSupplementary]
